# Supplementary material for: Determination and distribution of pesticides and antibiotics in agricultural soils from northern China
Source: Royal Society of Chemistry journal article supplement (doi:10.1039/c9ra00783k), 2019-01-01
Supplement: c9ra00783k1.pdf [file c9ra00783k1.pdf]

## Supporting Information

### Determination and distribution of pesticides and antibiotics in agricultural soils from northern China

Lixiang Pan<sup>a</sup>, Xiaoxiao Feng<sup>a</sup>, Meng Cao<sup>b</sup>, Shiwen Zhang<sup>c</sup>, Yuanfang Huang<sup>b</sup>, Tianheng Xu<sup>a</sup>, Jing Jing<sup>a</sup>, Hongyan Zhang<sup>a\*</sup>

<sup>a</sup> College of Science, China Agricultural University, Beijing, 100193, P R China

<sup>b</sup> College of Resources and Environmental Sciences, China Agricultural University, Beijing, 100193, P R China;

<sup>c</sup> College of Earth and Environmental Sciences, Anhui University of Science and Technology, Huainan, Anhui province, 232001, P R China;

\* Corresponding author; Email: hongyan@cau.edu.cn; Tel: 010-62733219; Fax: 010-62733620

**Table S1.** The gradient elution program for 47 pesticides analysis

| Time (min) | Methanol (%) | 0.1% formic acid water (%) | Flow rate (mL/min) |
|------------|--------------|----------------------------|--------------------|
| 0          | 1            | 99                         | 0.2                |
| 0.5        | 1            | 99                         | 0.2                |
| 2          | 30           | 70                         | 0.2                |
| 4          | 30           | 70                         | 0.2                |
| 8          | 70           | 30                         | 0.2                |
| 10         | 70           | 30                         | 0.2                |
| 11         | 99           | 1                          | 0.2                |
| 16         | 99           | 1                          | 0.2                |
| 17.5       | 1            | 99                         | 0.2                |
| 25         | 1            | 99                         | 0.2                |

**Table S2.** The gradient elution program for 10 antibiotics analysis

| Time (min) | Methanol (%) | 0.1% formic acid water (%) | Flow rate (mL/min) |
|------------|--------------|----------------------------|--------------------|
| 0          | 5            | 95                         | 0.3                |
| 1          | 5            | 95                         | 0.3                |
| 5          | 25           | 75                         | 0.3                |
| 8.5        | 90           | 10                         | 0.3                |
| 9.5        | 90           | 10                         | 0.3                |

|    |   |    |     |
|----|---|----|-----|
| 10 | 5 | 95 | 0.3 |
| 13 | 5 | 95 | 0.3 |

---

**Table S3.** HPLC-MS/MS parameters and validation results (calibration curves, R<sup>2</sup>, LOD, recoveries and RSD) of 47 pesticides

| Category                   | Compounds          | RT(min) | Fragmentor(V) | Precursor ion | Product ion | Collision energy (V)            | Calibration curve (R <sup>2</sup> ) | LOD µg/kg | Recovery, %( RSD, %) |            |                            |                    |       |       |        |        |                                 |                                  |                                |        |        |       |       |                   |                            |                    |       |        |        |                                 |                                  |                                |        |        |       |       |                   |                            |                    |       |        |        |                                 |                                  |                                |        |        |       |       |                   |                            |                    |       |        |        |                                 |                                  |                                |        |        |       |       |                   |                            |                    |       |        |        |                                 |                                 |                                |        |        |       |       |                   |                            |                    |       |       |        |        |                                 |                                |        |        |       |       |       |                            |                    |       |       |        |        |                                 |                                |       |        |       |       |       |                   |                            |                    |       |        |       |                                 |                                |                                |        |        |       |       |                   |                            |                    |       |        |       |                                 |                                |                                |        |        |       |       |                   |                            |                    |       |        |       |                                 |                                |                                |        |        |       |       |                   |                            |                    |       |       |       |        |                                |                                |       |        |       |       |       |                            |                    |       |     |       |
|----------------------------|--------------------|---------|---------------|---------------|-------------|---------------------------------|-------------------------------------|-----------|----------------------|------------|----------------------------|--------------------|-------|-------|--------|--------|---------------------------------|----------------------------------|--------------------------------|--------|--------|-------|-------|-------------------|----------------------------|--------------------|-------|--------|--------|---------------------------------|----------------------------------|--------------------------------|--------|--------|-------|-------|-------------------|----------------------------|--------------------|-------|--------|--------|---------------------------------|----------------------------------|--------------------------------|--------|--------|-------|-------|-------------------|----------------------------|--------------------|-------|--------|--------|---------------------------------|----------------------------------|--------------------------------|--------|--------|-------|-------|-------------------|----------------------------|--------------------|-------|--------|--------|---------------------------------|---------------------------------|--------------------------------|--------|--------|-------|-------|-------------------|----------------------------|--------------------|-------|-------|--------|--------|---------------------------------|--------------------------------|--------|--------|-------|-------|-------|----------------------------|--------------------|-------|-------|--------|--------|---------------------------------|--------------------------------|-------|--------|-------|-------|-------|-------------------|----------------------------|--------------------|-------|--------|-------|---------------------------------|--------------------------------|--------------------------------|--------|--------|-------|-------|-------------------|----------------------------|--------------------|-------|--------|-------|---------------------------------|--------------------------------|--------------------------------|--------|--------|-------|-------|-------------------|----------------------------|--------------------|-------|--------|-------|---------------------------------|--------------------------------|--------------------------------|--------|--------|-------|-------|-------------------|----------------------------|--------------------|-------|-------|-------|--------|--------------------------------|--------------------------------|-------|--------|-------|-------|-------|----------------------------|--------------------|-------|-----|-------|
|                            |                    |         |               |               |             |                                 |                                     |           | 0.005 mg/kg          | 0.05 mg/kg | 0.5 mg/kg                  |                    |       |       |        |        |                                 |                                  |                                |        |        |       |       |                   |                            |                    |       |        |        |                                 |                                  |                                |        |        |       |       |                   |                            |                    |       |        |        |                                 |                                  |                                |        |        |       |       |                   |                            |                    |       |        |        |                                 |                                  |                                |        |        |       |       |                   |                            |                    |       |        |        |                                 |                                 |                                |        |        |       |       |                   |                            |                    |       |       |        |        |                                 |                                |        |        |       |       |       |                            |                    |       |       |        |        |                                 |                                |       |        |       |       |       |                   |                            |                    |       |        |       |                                 |                                |                                |        |        |       |       |                   |                            |                    |       |        |       |                                 |                                |                                |        |        |       |       |                   |                            |                    |       |        |       |                                 |                                |                                |        |        |       |       |                   |                            |                    |       |       |       |        |                                |                                |       |        |       |       |       |                            |                    |       |     |       |
| Amides/anilines            | Acetochlor         | 16.15   | 80            | 270.2         | 148.2*      | 15                              | y = 92752x - 664.36<br>(0.9993)     | 0.03      | 85(10)               | 87(12)     | 81(8)                      |                    |       |       |        |        |                                 |                                  |                                |        |        |       |       |                   |                            |                    |       |        |        |                                 |                                  |                                |        |        |       |       |                   |                            |                    |       |        |        |                                 |                                  |                                |        |        |       |       |                   |                            |                    |       |        |        |                                 |                                  |                                |        |        |       |       |                   |                            |                    |       |        |        |                                 |                                 |                                |        |        |       |       |                   |                            |                    |       |       |        |        |                                 |                                |        |        |       |       |       |                            |                    |       |       |        |        |                                 |                                |       |        |       |       |       |                   |                            |                    |       |        |       |                                 |                                |                                |        |        |       |       |                   |                            |                    |       |        |       |                                 |                                |                                |        |        |       |       |                   |                            |                    |       |        |       |                                 |                                |                                |        |        |       |       |                   |                            |                    |       |       |       |        |                                |                                |       |        |       |       |       |                            |                    |       |     |       |
|                            |                    |         |               |               | 133.3       | 30                              |                                     |           |                      |            |                            | Boscalid           | 15.50 | 140   | 343.2  | 307.2* | 20                              | y = 434522x - 3297<br>(0.9997)   | 0.03                           | 82(10) | 72(4)  | 72(2) | 271.0 | 35                | Butachlor                  | 17.42              | 80    | 312.2  | 238.1* | 10                              | y = 352578x - 1295.5<br>(0.9998) | 1.00                           | 94(10) | 95(6)  | 72(3) | 162.0 | 20                | Cloransulam-methyl         | 13.73              | 80    | 430.0  | 370.0* | 20                              | y = 290085x - 4415.3<br>(0.9957) | 0.04                           | 80(18) | 79(7)  | 84(3) | 306.0 | 25                | Diflufenican               | 17.08              | 110   | 395.0  | 266.1* | 20                              | y = 255956x + 892.09<br>(0.9967) | 0.13                           | 93(11) | 76(14) | 75(2) | 246.0 | 30                | Mefenacet                  | 15.92              | 90    | 299.1  | 148.2* | 4                               | y = 1E+06x + 1146.4<br>(1.0000) | 0.05                           | 76(11) | 74(2)  | 72(5) | 120.0 | 10                | Metolachlor                | 16.25              | 95    | 284.2 | 176.4* | 12     | y = 531672x - 4288<br>(0.9992)  | 0.16                           | 99(13) | 75(6)  | 78(3) | 253.2 | 12    | Penoxsulam                 | 13.91              | 150   | 484.0 | 195.1* | 30     | y = 334217x - 4208<br>(0.9969)  | 0.04                           | 75(4) | 83(8)  | 87(3) | 164.0 | 40    | Pretilachlor      | 17.11                      | 100                | 312.2 | 252.2* | 10    | y = 4E+06x + 25679<br>(0.9980)  | 0.48                           | 73(3)                          | 72(1)  | 75(3)  | 176.2 | 15    | Pyrimethanil      | 13.95                      | 120                | 200.2 | 107.0* | 25    | y = 2E+06x - 17585<br>(0.9996)  | 0.85                           | 78(9)                          | 71(4)  | 73(4)  | 183.1 | 25    | Thiﬂuzamide       | 16.33                      | 160                | 529.0 | 488.9* | 30    | y = 27724x + 554.84<br>(0.9944) | 1.00                           | 95(8)                          | 85(13) | 85(7)  | 168.0 | 25    | Anilinopyrimidine | Cyprodinil                 | 15.52              | 120   | 226.0 | 93.0* | 40     | y = 2E+06x - 28570<br>(0.9978) | 0.22                           | 73(5) | 75(3)  | 72(1) | 108.0 | 30    | Aryloxyphenoxy-propionates | Fenoxaprop-p-ethyl | 17.27 | 100 | 362.2 |
|                            | Boscalid           | 15.50   | 140           | 343.2         | 307.2*      | 20                              | y = 434522x - 3297<br>(0.9997)      | 0.03      | 82(10)               | 72(4)      | 72(2)                      |                    |       |       |        |        |                                 |                                  |                                |        |        |       |       |                   |                            |                    |       |        |        |                                 |                                  |                                |        |        |       |       |                   |                            |                    |       |        |        |                                 |                                  |                                |        |        |       |       |                   |                            |                    |       |        |        |                                 |                                  |                                |        |        |       |       |                   |                            |                    |       |        |        |                                 |                                 |                                |        |        |       |       |                   |                            |                    |       |       |        |        |                                 |                                |        |        |       |       |       |                            |                    |       |       |        |        |                                 |                                |       |        |       |       |       |                   |                            |                    |       |        |       |                                 |                                |                                |        |        |       |       |                   |                            |                    |       |        |       |                                 |                                |                                |        |        |       |       |                   |                            |                    |       |        |       |                                 |                                |                                |        |        |       |       |                   |                            |                    |       |       |       |        |                                |                                |       |        |       |       |       |                            |                    |       |     |       |
|                            |                    |         |               |               | 271.0       | 35                              |                                     |           |                      |            |                            | Butachlor          | 17.42 | 80    | 312.2  | 238.1* | 10                              | y = 352578x - 1295.5<br>(0.9998) | 1.00                           | 94(10) | 95(6)  | 72(3) | 162.0 | 20                | Cloransulam-methyl         | 13.73              | 80    | 430.0  | 370.0* | 20                              | y = 290085x - 4415.3<br>(0.9957) | 0.04                           | 80(18) | 79(7)  | 84(3) | 306.0 | 25                | Diflufenican               | 17.08              | 110   | 395.0  | 266.1* | 20                              | y = 255956x + 892.09<br>(0.9967) | 0.13                           | 93(11) | 76(14) | 75(2) | 246.0 | 30                | Mefenacet                  | 15.92              | 90    | 299.1  | 148.2* | 4                               | y = 1E+06x + 1146.4<br>(1.0000)  | 0.05                           | 76(11) | 74(2)  | 72(5) | 120.0 | 10                | Metolachlor                | 16.25              | 95    | 284.2  | 176.4* | 12                              | y = 531672x - 4288<br>(0.9992)  | 0.16                           | 99(13) | 75(6)  | 78(3) | 253.2 | 12                | Penoxsulam                 | 13.91              | 150   | 484.0 | 195.1* | 30     | y = 334217x - 4208<br>(0.9969)  | 0.04                           | 75(4)  | 83(8)  | 87(3) | 164.0 | 40    | Pretilachlor               | 17.11              | 100   | 312.2 | 252.2* | 10     | y = 4E+06x + 25679<br>(0.9980)  | 0.48                           | 73(3) | 72(1)  | 75(3) | 176.2 | 15    | Pyrimethanil      | 13.95                      | 120                | 200.2 | 107.0* | 25    | y = 2E+06x - 17585<br>(0.9996)  | 0.85                           | 78(9)                          | 71(4)  | 73(4)  | 183.1 | 25    | Thiﬂuzamide       | 16.33                      | 160                | 529.0 | 488.9* | 30    | y = 27724x + 554.84<br>(0.9944) | 1.00                           | 95(8)                          | 85(13) | 85(7)  | 168.0 | 25    | Anilinopyrimidine | Cyprodinil                 | 15.52              | 120   | 226.0  | 93.0* | 40                              | y = 2E+06x - 28570<br>(0.9978) | 0.22                           | 73(5)  | 75(3)  | 72(1) | 108.0 | 30                | Aryloxyphenoxy-propionates | Fenoxaprop-p-ethyl | 17.27 | 100   | 362.2 | 288.1* | 15                             | y = 1E+06x + 15727<br>(0.9966) | 0.24  | 84(14) | 71(1) | 75(3) | 244.2 | 20                         |                    |       |     |       |
|                            | Butachlor          | 17.42   | 80            | 312.2         | 238.1*      | 10                              | y = 352578x - 1295.5<br>(0.9998)    | 1.00      | 94(10)               | 95(6)      | 72(3)                      |                    |       |       |        |        |                                 |                                  |                                |        |        |       |       |                   |                            |                    |       |        |        |                                 |                                  |                                |        |        |       |       |                   |                            |                    |       |        |        |                                 |                                  |                                |        |        |       |       |                   |                            |                    |       |        |        |                                 |                                  |                                |        |        |       |       |                   |                            |                    |       |        |        |                                 |                                 |                                |        |        |       |       |                   |                            |                    |       |       |        |        |                                 |                                |        |        |       |       |       |                            |                    |       |       |        |        |                                 |                                |       |        |       |       |       |                   |                            |                    |       |        |       |                                 |                                |                                |        |        |       |       |                   |                            |                    |       |        |       |                                 |                                |                                |        |        |       |       |                   |                            |                    |       |        |       |                                 |                                |                                |        |        |       |       |                   |                            |                    |       |       |       |        |                                |                                |       |        |       |       |       |                            |                    |       |     |       |
|                            |                    |         |               |               | 162.0       | 20                              |                                     |           |                      |            |                            | Cloransulam-methyl | 13.73 | 80    | 430.0  | 370.0* | 20                              | y = 290085x - 4415.3<br>(0.9957) | 0.04                           | 80(18) | 79(7)  | 84(3) | 306.0 | 25                | Diflufenican               | 17.08              | 110   | 395.0  | 266.1* | 20                              | y = 255956x + 892.09<br>(0.9967) | 0.13                           | 93(11) | 76(14) | 75(2) | 246.0 | 30                | Mefenacet                  | 15.92              | 90    | 299.1  | 148.2* | 4                               | y = 1E+06x + 1146.4<br>(1.0000)  | 0.05                           | 76(11) | 74(2)  | 72(5) | 120.0 | 10                | Metolachlor                | 16.25              | 95    | 284.2  | 176.4* | 12                              | y = 531672x - 4288<br>(0.9992)   | 0.16                           | 99(13) | 75(6)  | 78(3) | 253.2 | 12                | Penoxsulam                 | 13.91              | 150   | 484.0  | 195.1* | 30                              | y = 334217x - 4208<br>(0.9969)  | 0.04                           | 75(4)  | 83(8)  | 87(3) | 164.0 | 40                | Pretilachlor               | 17.11              | 100   | 312.2 | 252.2* | 10     | y = 4E+06x + 25679<br>(0.9980)  | 0.48                           | 73(3)  | 72(1)  | 75(3) | 176.2 | 15    | Pyrimethanil               | 13.95              | 120   | 200.2 | 107.0* | 25     | y = 2E+06x - 17585<br>(0.9996)  | 0.85                           | 78(9) | 71(4)  | 73(4) | 183.1 | 25    | Thiﬂuzamide       | 16.33                      | 160                | 529.0 | 488.9* | 30    | y = 27724x + 554.84<br>(0.9944) | 1.00                           | 95(8)                          | 85(13) | 85(7)  | 168.0 | 25    | Anilinopyrimidine | Cyprodinil                 | 15.52              | 120   | 226.0  | 93.0* | 40                              | y = 2E+06x - 28570<br>(0.9978) | 0.22                           | 73(5)  | 75(3)  | 72(1) | 108.0 | 30                | Aryloxyphenoxy-propionates | Fenoxaprop-p-ethyl | 17.27 | 100    | 362.2 | 288.1*                          | 15                             | y = 1E+06x + 15727<br>(0.9966) | 0.24   | 84(14) | 71(1) | 75(3) | 244.2             | 20                         |                    |       |       |       |        |                                |                                |       |        |       |       |       |                            |                    |       |     |       |
|                            | Cloransulam-methyl | 13.73   | 80            | 430.0         | 370.0*      | 20                              | y = 290085x - 4415.3<br>(0.9957)    | 0.04      | 80(18)               | 79(7)      | 84(3)                      |                    |       |       |        |        |                                 |                                  |                                |        |        |       |       |                   |                            |                    |       |        |        |                                 |                                  |                                |        |        |       |       |                   |                            |                    |       |        |        |                                 |                                  |                                |        |        |       |       |                   |                            |                    |       |        |        |                                 |                                  |                                |        |        |       |       |                   |                            |                    |       |        |        |                                 |                                 |                                |        |        |       |       |                   |                            |                    |       |       |        |        |                                 |                                |        |        |       |       |       |                            |                    |       |       |        |        |                                 |                                |       |        |       |       |       |                   |                            |                    |       |        |       |                                 |                                |                                |        |        |       |       |                   |                            |                    |       |        |       |                                 |                                |                                |        |        |       |       |                   |                            |                    |       |        |       |                                 |                                |                                |        |        |       |       |                   |                            |                    |       |       |       |        |                                |                                |       |        |       |       |       |                            |                    |       |     |       |
|                            |                    |         |               |               | 306.0       | 25                              |                                     |           |                      |            |                            | Diflufenican       | 17.08 | 110   | 395.0  | 266.1* | 20                              | y = 255956x + 892.09<br>(0.9967) | 0.13                           | 93(11) | 76(14) | 75(2) | 246.0 | 30                | Mefenacet                  | 15.92              | 90    | 299.1  | 148.2* | 4                               | y = 1E+06x + 1146.4<br>(1.0000)  | 0.05                           | 76(11) | 74(2)  | 72(5) | 120.0 | 10                | Metolachlor                | 16.25              | 95    | 284.2  | 176.4* | 12                              | y = 531672x - 4288<br>(0.9992)   | 0.16                           | 99(13) | 75(6)  | 78(3) | 253.2 | 12                | Penoxsulam                 | 13.91              | 150   | 484.0  | 195.1* | 30                              | y = 334217x - 4208<br>(0.9969)   | 0.04                           | 75(4)  | 83(8)  | 87(3) | 164.0 | 40                | Pretilachlor               | 17.11              | 100   | 312.2  | 252.2* | 10                              | y = 4E+06x + 25679<br>(0.9980)  | 0.48                           | 73(3)  | 72(1)  | 75(3) | 176.2 | 15                | Pyrimethanil               | 13.95              | 120   | 200.2 | 107.0* | 25     | y = 2E+06x - 17585<br>(0.9996)  | 0.85                           | 78(9)  | 71(4)  | 73(4) | 183.1 | 25    | Thiﬂuzamide                | 16.33              | 160   | 529.0 | 488.9* | 30     | y = 27724x + 554.84<br>(0.9944) | 1.00                           | 95(8) | 85(13) | 85(7) | 168.0 | 25    | Anilinopyrimidine | Cyprodinil                 | 15.52              | 120   | 226.0  | 93.0* | 40                              | y = 2E+06x - 28570<br>(0.9978) | 0.22                           | 73(5)  | 75(3)  | 72(1) | 108.0 | 30                | Aryloxyphenoxy-propionates | Fenoxaprop-p-ethyl | 17.27 | 100    | 362.2 | 288.1*                          | 15                             | y = 1E+06x + 15727<br>(0.9966) | 0.24   | 84(14) | 71(1) | 75(3) | 244.2             | 20                         |                    |       |        |       |                                 |                                |                                |        |        |       |       |                   |                            |                    |       |       |       |        |                                |                                |       |        |       |       |       |                            |                    |       |     |       |
|                            | Diflufenican       | 17.08   | 110           | 395.0         | 266.1*      | 20                              | y = 255956x + 892.09<br>(0.9967)    | 0.13      | 93(11)               | 76(14)     | 75(2)                      |                    |       |       |        |        |                                 |                                  |                                |        |        |       |       |                   |                            |                    |       |        |        |                                 |                                  |                                |        |        |       |       |                   |                            |                    |       |        |        |                                 |                                  |                                |        |        |       |       |                   |                            |                    |       |        |        |                                 |                                  |                                |        |        |       |       |                   |                            |                    |       |        |        |                                 |                                 |                                |        |        |       |       |                   |                            |                    |       |       |        |        |                                 |                                |        |        |       |       |       |                            |                    |       |       |        |        |                                 |                                |       |        |       |       |       |                   |                            |                    |       |        |       |                                 |                                |                                |        |        |       |       |                   |                            |                    |       |        |       |                                 |                                |                                |        |        |       |       |                   |                            |                    |       |        |       |                                 |                                |                                |        |        |       |       |                   |                            |                    |       |       |       |        |                                |                                |       |        |       |       |       |                            |                    |       |     |       |
|                            |                    |         |               |               | 246.0       | 30                              |                                     |           |                      |            |                            | Mefenacet          | 15.92 | 90    | 299.1  | 148.2* | 4                               | y = 1E+06x + 1146.4<br>(1.0000)  | 0.05                           | 76(11) | 74(2)  | 72(5) | 120.0 | 10                | Metolachlor                | 16.25              | 95    | 284.2  | 176.4* | 12                              | y = 531672x - 4288<br>(0.9992)   | 0.16                           | 99(13) | 75(6)  | 78(3) | 253.2 | 12                | Penoxsulam                 | 13.91              | 150   | 484.0  | 195.1* | 30                              | y = 334217x - 4208<br>(0.9969)   | 0.04                           | 75(4)  | 83(8)  | 87(3) | 164.0 | 40                | Pretilachlor               | 17.11              | 100   | 312.2  | 252.2* | 10                              | y = 4E+06x + 25679<br>(0.9980)   | 0.48                           | 73(3)  | 72(1)  | 75(3) | 176.2 | 15                | Pyrimethanil               | 13.95              | 120   | 200.2  | 107.0* | 25                              | y = 2E+06x - 17585<br>(0.9996)  | 0.85                           | 78(9)  | 71(4)  | 73(4) | 183.1 | 25                | Thiﬂuzamide                | 16.33              | 160   | 529.0 | 488.9* | 30     | y = 27724x + 554.84<br>(0.9944) | 1.00                           | 95(8)  | 85(13) | 85(7) | 168.0 | 25    | Anilinopyrimidine          | Cyprodinil         | 15.52 | 120   | 226.0  | 93.0*  | 40                              | y = 2E+06x - 28570<br>(0.9978) | 0.22  | 73(5)  | 75(3) | 72(1) | 108.0 | 30                | Aryloxyphenoxy-propionates | Fenoxaprop-p-ethyl | 17.27 | 100    | 362.2 | 288.1*                          | 15                             | y = 1E+06x + 15727<br>(0.9966) | 0.24   | 84(14) | 71(1) | 75(3) | 244.2             | 20                         |                    |       |        |       |                                 |                                |                                |        |        |       |       |                   |                            |                    |       |        |       |                                 |                                |                                |        |        |       |       |                   |                            |                    |       |       |       |        |                                |                                |       |        |       |       |       |                            |                    |       |     |       |
| Mefenacet                  | 15.92              | 90      | 299.1         | 148.2*        | 4           | y = 1E+06x + 1146.4<br>(1.0000) | 0.05                                | 76(11)    | 74(2)                | 72(5)      |                            |                    |       |       |        |        |                                 |                                  |                                |        |        |       |       |                   |                            |                    |       |        |        |                                 |                                  |                                |        |        |       |       |                   |                            |                    |       |        |        |                                 |                                  |                                |        |        |       |       |                   |                            |                    |       |        |        |                                 |                                  |                                |        |        |       |       |                   |                            |                    |       |        |        |                                 |                                 |                                |        |        |       |       |                   |                            |                    |       |       |        |        |                                 |                                |        |        |       |       |       |                            |                    |       |       |        |        |                                 |                                |       |        |       |       |       |                   |                            |                    |       |        |       |                                 |                                |                                |        |        |       |       |                   |                            |                    |       |        |       |                                 |                                |                                |        |        |       |       |                   |                            |                    |       |        |       |                                 |                                |                                |        |        |       |       |                   |                            |                    |       |       |       |        |                                |                                |       |        |       |       |       |                            |                    |       |     |       |
|                            |                    |         |               | 120.0         | 10          |                                 |                                     |           |                      |            | Metolachlor                | 16.25              | 95    | 284.2 | 176.4* | 12     | y = 531672x - 4288<br>(0.9992)  | 0.16                             | 99(13)                         | 75(6)  | 78(3)  | 253.2 | 12    | Penoxsulam        | 13.91                      | 150                | 484.0 | 195.1* | 30     | y = 334217x - 4208<br>(0.9969)  | 0.04                             | 75(4)                          | 83(8)  | 87(3)  | 164.0 | 40    | Pretilachlor      | 17.11                      | 100                | 312.2 | 252.2* | 10     | y = 4E+06x + 25679<br>(0.9980)  | 0.48                             | 73(3)                          | 72(1)  | 75(3)  | 176.2 | 15    | Pyrimethanil      | 13.95                      | 120                | 200.2 | 107.0* | 25     | y = 2E+06x - 17585<br>(0.9996)  | 0.85                             | 78(9)                          | 71(4)  | 73(4)  | 183.1 | 25    | Thiﬂuzamide       | 16.33                      | 160                | 529.0 | 488.9* | 30     | y = 27724x + 554.84<br>(0.9944) | 1.00                            | 95(8)                          | 85(13) | 85(7)  | 168.0 | 25    | Anilinopyrimidine | Cyprodinil                 | 15.52              | 120   | 226.0 | 93.0*  | 40     | y = 2E+06x - 28570<br>(0.9978)  | 0.22                           | 73(5)  | 75(3)  | 72(1) | 108.0 | 30    | Aryloxyphenoxy-propionates | Fenoxaprop-p-ethyl | 17.27 | 100   | 362.2  | 288.1* | 15                              | y = 1E+06x + 15727<br>(0.9966) | 0.24  | 84(14) | 71(1) | 75(3) | 244.2 | 20                |                            |                    |       |        |       |                                 |                                |                                |        |        |       |       |                   |                            |                    |       |        |       |                                 |                                |                                |        |        |       |       |                   |                            |                    |       |        |       |                                 |                                |                                |        |        |       |       |                   |                            |                    |       |       |       |        |                                |                                |       |        |       |       |       |                            |                    |       |     |       |
| Metolachlor                | 16.25              | 95      | 284.2         | 176.4*        | 12          | y = 531672x - 4288<br>(0.9992)  | 0.16                                | 99(13)    | 75(6)                | 78(3)      |                            |                    |       |       |        |        |                                 |                                  |                                |        |        |       |       |                   |                            |                    |       |        |        |                                 |                                  |                                |        |        |       |       |                   |                            |                    |       |        |        |                                 |                                  |                                |        |        |       |       |                   |                            |                    |       |        |        |                                 |                                  |                                |        |        |       |       |                   |                            |                    |       |        |        |                                 |                                 |                                |        |        |       |       |                   |                            |                    |       |       |        |        |                                 |                                |        |        |       |       |       |                            |                    |       |       |        |        |                                 |                                |       |        |       |       |       |                   |                            |                    |       |        |       |                                 |                                |                                |        |        |       |       |                   |                            |                    |       |        |       |                                 |                                |                                |        |        |       |       |                   |                            |                    |       |        |       |                                 |                                |                                |        |        |       |       |                   |                            |                    |       |       |       |        |                                |                                |       |        |       |       |       |                            |                    |       |     |       |
|                            |                    |         |               | 253.2         | 12          |                                 |                                     |           |                      |            | Penoxsulam                 | 13.91              | 150   | 484.0 | 195.1* | 30     | y = 334217x - 4208<br>(0.9969)  | 0.04                             | 75(4)                          | 83(8)  | 87(3)  | 164.0 | 40    | Pretilachlor      | 17.11                      | 100                | 312.2 | 252.2* | 10     | y = 4E+06x + 25679<br>(0.9980)  | 0.48                             | 73(3)                          | 72(1)  | 75(3)  | 176.2 | 15    | Pyrimethanil      | 13.95                      | 120                | 200.2 | 107.0* | 25     | y = 2E+06x - 17585<br>(0.9996)  | 0.85                             | 78(9)                          | 71(4)  | 73(4)  | 183.1 | 25    | Thiﬂuzamide       | 16.33                      | 160                | 529.0 | 488.9* | 30     | y = 27724x + 554.84<br>(0.9944) | 1.00                             | 95(8)                          | 85(13) | 85(7)  | 168.0 | 25    | Anilinopyrimidine | Cyprodinil                 | 15.52              | 120   | 226.0  | 93.0*  | 40                              | y = 2E+06x - 28570<br>(0.9978)  | 0.22                           | 73(5)  | 75(3)  | 72(1) | 108.0 | 30                | Aryloxyphenoxy-propionates | Fenoxaprop-p-ethyl | 17.27 | 100   | 362.2  | 288.1* | 15                              | y = 1E+06x + 15727<br>(0.9966) | 0.24   | 84(14) | 71(1) | 75(3) | 244.2 | 20                         |                    |       |       |        |        |                                 |                                |       |        |       |       |       |                   |                            |                    |       |        |       |                                 |                                |                                |        |        |       |       |                   |                            |                    |       |        |       |                                 |                                |                                |        |        |       |       |                   |                            |                    |       |        |       |                                 |                                |                                |        |        |       |       |                   |                            |                    |       |       |       |        |                                |                                |       |        |       |       |       |                            |                    |       |     |       |
| Penoxsulam                 | 13.91              | 150     | 484.0         | 195.1*        | 30          | y = 334217x - 4208<br>(0.9969)  | 0.04                                | 75(4)     | 83(8)                | 87(3)      |                            |                    |       |       |        |        |                                 |                                  |                                |        |        |       |       |                   |                            |                    |       |        |        |                                 |                                  |                                |        |        |       |       |                   |                            |                    |       |        |        |                                 |                                  |                                |        |        |       |       |                   |                            |                    |       |        |        |                                 |                                  |                                |        |        |       |       |                   |                            |                    |       |        |        |                                 |                                 |                                |        |        |       |       |                   |                            |                    |       |       |        |        |                                 |                                |        |        |       |       |       |                            |                    |       |       |        |        |                                 |                                |       |        |       |       |       |                   |                            |                    |       |        |       |                                 |                                |                                |        |        |       |       |                   |                            |                    |       |        |       |                                 |                                |                                |        |        |       |       |                   |                            |                    |       |        |       |                                 |                                |                                |        |        |       |       |                   |                            |                    |       |       |       |        |                                |                                |       |        |       |       |       |                            |                    |       |     |       |
|                            |                    |         |               | 164.0         | 40          |                                 |                                     |           |                      |            | Pretilachlor               | 17.11              | 100   | 312.2 | 252.2* | 10     | y = 4E+06x + 25679<br>(0.9980)  | 0.48                             | 73(3)                          | 72(1)  | 75(3)  | 176.2 | 15    | Pyrimethanil      | 13.95                      | 120                | 200.2 | 107.0* | 25     | y = 2E+06x - 17585<br>(0.9996)  | 0.85                             | 78(9)                          | 71(4)  | 73(4)  | 183.1 | 25    | Thiﬂuzamide       | 16.33                      | 160                | 529.0 | 488.9* | 30     | y = 27724x + 554.84<br>(0.9944) | 1.00                             | 95(8)                          | 85(13) | 85(7)  | 168.0 | 25    | Anilinopyrimidine | Cyprodinil                 | 15.52              | 120   | 226.0  | 93.0*  | 40                              | y = 2E+06x - 28570<br>(0.9978)   | 0.22                           | 73(5)  | 75(3)  | 72(1) | 108.0 | 30                | Aryloxyphenoxy-propionates | Fenoxaprop-p-ethyl | 17.27 | 100    | 362.2  | 288.1*                          | 15                              | y = 1E+06x + 15727<br>(0.9966) | 0.24   | 84(14) | 71(1) | 75(3) | 244.2             | 20                         |                    |       |       |        |        |                                 |                                |        |        |       |       |       |                            |                    |       |       |        |        |                                 |                                |       |        |       |       |       |                   |                            |                    |       |        |       |                                 |                                |                                |        |        |       |       |                   |                            |                    |       |        |       |                                 |                                |                                |        |        |       |       |                   |                            |                    |       |        |       |                                 |                                |                                |        |        |       |       |                   |                            |                    |       |       |       |        |                                |                                |       |        |       |       |       |                            |                    |       |     |       |
| Pretilachlor               | 17.11              | 100     | 312.2         | 252.2*        | 10          | y = 4E+06x + 25679<br>(0.9980)  | 0.48                                | 73(3)     | 72(1)                | 75(3)      |                            |                    |       |       |        |        |                                 |                                  |                                |        |        |       |       |                   |                            |                    |       |        |        |                                 |                                  |                                |        |        |       |       |                   |                            |                    |       |        |        |                                 |                                  |                                |        |        |       |       |                   |                            |                    |       |        |        |                                 |                                  |                                |        |        |       |       |                   |                            |                    |       |        |        |                                 |                                 |                                |        |        |       |       |                   |                            |                    |       |       |        |        |                                 |                                |        |        |       |       |       |                            |                    |       |       |        |        |                                 |                                |       |        |       |       |       |                   |                            |                    |       |        |       |                                 |                                |                                |        |        |       |       |                   |                            |                    |       |        |       |                                 |                                |                                |        |        |       |       |                   |                            |                    |       |        |       |                                 |                                |                                |        |        |       |       |                   |                            |                    |       |       |       |        |                                |                                |       |        |       |       |       |                            |                    |       |     |       |
|                            |                    |         |               | 176.2         | 15          |                                 |                                     |           |                      |            | Pyrimethanil               | 13.95              | 120   | 200.2 | 107.0* | 25     | y = 2E+06x - 17585<br>(0.9996)  | 0.85                             | 78(9)                          | 71(4)  | 73(4)  | 183.1 | 25    | Thiﬂuzamide       | 16.33                      | 160                | 529.0 | 488.9* | 30     | y = 27724x + 554.84<br>(0.9944) | 1.00                             | 95(8)                          | 85(13) | 85(7)  | 168.0 | 25    | Anilinopyrimidine | Cyprodinil                 | 15.52              | 120   | 226.0  | 93.0*  | 40                              | y = 2E+06x - 28570<br>(0.9978)   | 0.22                           | 73(5)  | 75(3)  | 72(1) | 108.0 | 30                | Aryloxyphenoxy-propionates | Fenoxaprop-p-ethyl | 17.27 | 100    | 362.2  | 288.1*                          | 15                               | y = 1E+06x + 15727<br>(0.9966) | 0.24   | 84(14) | 71(1) | 75(3) | 244.2             | 20                         |                    |       |        |        |                                 |                                 |                                |        |        |       |       |                   |                            |                    |       |       |        |        |                                 |                                |        |        |       |       |       |                            |                    |       |       |        |        |                                 |                                |       |        |       |       |       |                   |                            |                    |       |        |       |                                 |                                |                                |        |        |       |       |                   |                            |                    |       |        |       |                                 |                                |                                |        |        |       |       |                   |                            |                    |       |        |       |                                 |                                |                                |        |        |       |       |                   |                            |                    |       |       |       |        |                                |                                |       |        |       |       |       |                            |                    |       |     |       |
| Pyrimethanil               | 13.95              | 120     | 200.2         | 107.0*        | 25          | y = 2E+06x - 17585<br>(0.9996)  | 0.85                                | 78(9)     | 71(4)                | 73(4)      |                            |                    |       |       |        |        |                                 |                                  |                                |        |        |       |       |                   |                            |                    |       |        |        |                                 |                                  |                                |        |        |       |       |                   |                            |                    |       |        |        |                                 |                                  |                                |        |        |       |       |                   |                            |                    |       |        |        |                                 |                                  |                                |        |        |       |       |                   |                            |                    |       |        |        |                                 |                                 |                                |        |        |       |       |                   |                            |                    |       |       |        |        |                                 |                                |        |        |       |       |       |                            |                    |       |       |        |        |                                 |                                |       |        |       |       |       |                   |                            |                    |       |        |       |                                 |                                |                                |        |        |       |       |                   |                            |                    |       |        |       |                                 |                                |                                |        |        |       |       |                   |                            |                    |       |        |       |                                 |                                |                                |        |        |       |       |                   |                            |                    |       |       |       |        |                                |                                |       |        |       |       |       |                            |                    |       |     |       |
|                            |                    |         |               | 183.1         | 25          |                                 |                                     |           |                      |            | Thiﬂuzamide                | 16.33              | 160   | 529.0 | 488.9* | 30     | y = 27724x + 554.84<br>(0.9944) | 1.00                             | 95(8)                          | 85(13) | 85(7)  | 168.0 | 25    | Anilinopyrimidine | Cyprodinil                 | 15.52              | 120   | 226.0  | 93.0*  | 40                              | y = 2E+06x - 28570<br>(0.9978)   | 0.22                           | 73(5)  | 75(3)  | 72(1) | 108.0 | 30                | Aryloxyphenoxy-propionates | Fenoxaprop-p-ethyl | 17.27 | 100    | 362.2  | 288.1*                          | 15                               | y = 1E+06x + 15727<br>(0.9966) | 0.24   | 84(14) | 71(1) | 75(3) | 244.2             | 20                         |                    |       |        |        |                                 |                                  |                                |        |        |       |       |                   |                            |                    |       |        |        |                                 |                                 |                                |        |        |       |       |                   |                            |                    |       |       |        |        |                                 |                                |        |        |       |       |       |                            |                    |       |       |        |        |                                 |                                |       |        |       |       |       |                   |                            |                    |       |        |       |                                 |                                |                                |        |        |       |       |                   |                            |                    |       |        |       |                                 |                                |                                |        |        |       |       |                   |                            |                    |       |        |       |                                 |                                |                                |        |        |       |       |                   |                            |                    |       |       |       |        |                                |                                |       |        |       |       |       |                            |                    |       |     |       |
| Thiﬂuzamide                | 16.33              | 160     | 529.0         | 488.9*        | 30          | y = 27724x + 554.84<br>(0.9944) | 1.00                                | 95(8)     | 85(13)               | 85(7)      |                            |                    |       |       |        |        |                                 |                                  |                                |        |        |       |       |                   |                            |                    |       |        |        |                                 |                                  |                                |        |        |       |       |                   |                            |                    |       |        |        |                                 |                                  |                                |        |        |       |       |                   |                            |                    |       |        |        |                                 |                                  |                                |        |        |       |       |                   |                            |                    |       |        |        |                                 |                                 |                                |        |        |       |       |                   |                            |                    |       |       |        |        |                                 |                                |        |        |       |       |       |                            |                    |       |       |        |        |                                 |                                |       |        |       |       |       |                   |                            |                    |       |        |       |                                 |                                |                                |        |        |       |       |                   |                            |                    |       |        |       |                                 |                                |                                |        |        |       |       |                   |                            |                    |       |        |       |                                 |                                |                                |        |        |       |       |                   |                            |                    |       |       |       |        |                                |                                |       |        |       |       |       |                            |                    |       |     |       |
|                            |                    |         |               | 168.0         | 25          |                                 |                                     |           |                      |            | Anilinopyrimidine          | Cyprodinil         | 15.52 | 120   | 226.0  | 93.0*  | 40                              | y = 2E+06x - 28570<br>(0.9978)   | 0.22                           | 73(5)  | 75(3)  | 72(1) | 108.0 | 30                | Aryloxyphenoxy-propionates | Fenoxaprop-p-ethyl | 17.27 | 100    | 362.2  | 288.1*                          | 15                               | y = 1E+06x + 15727<br>(0.9966) | 0.24   | 84(14) | 71(1) | 75(3) | 244.2             | 20                         |                    |       |        |        |                                 |                                  |                                |        |        |       |       |                   |                            |                    |       |        |        |                                 |                                  |                                |        |        |       |       |                   |                            |                    |       |        |        |                                 |                                 |                                |        |        |       |       |                   |                            |                    |       |       |        |        |                                 |                                |        |        |       |       |       |                            |                    |       |       |        |        |                                 |                                |       |        |       |       |       |                   |                            |                    |       |        |       |                                 |                                |                                |        |        |       |       |                   |                            |                    |       |        |       |                                 |                                |                                |        |        |       |       |                   |                            |                    |       |        |       |                                 |                                |                                |        |        |       |       |                   |                            |                    |       |       |       |        |                                |                                |       |        |       |       |       |                            |                    |       |     |       |
| Anilinopyrimidine          | Cyprodinil         | 15.52   | 120           | 226.0         | 93.0*       | 40                              | y = 2E+06x - 28570<br>(0.9978)      | 0.22      | 73(5)                | 75(3)      |                            |                    |       |       |        | 72(1)  |                                 |                                  |                                |        |        |       |       |                   |                            |                    |       |        |        |                                 |                                  |                                |        |        |       |       |                   |                            |                    |       |        |        |                                 |                                  |                                |        |        |       |       |                   |                            |                    |       |        |        |                                 |                                  |                                |        |        |       |       |                   |                            |                    |       |        |        |                                 |                                 |                                |        |        |       |       |                   |                            |                    |       |       |        |        |                                 |                                |        |        |       |       |       |                            |                    |       |       |        |        |                                 |                                |       |        |       |       |       |                   |                            |                    |       |        |       |                                 |                                |                                |        |        |       |       |                   |                            |                    |       |        |       |                                 |                                |                                |        |        |       |       |                   |                            |                    |       |        |       |                                 |                                |                                |        |        |       |       |                   |                            |                    |       |       |       |        |                                |                                |       |        |       |       |       |                            |                    |       |     |       |
|                            |                    |         |               |               | 108.0       | 30                              |                                     |           |                      |            | Aryloxyphenoxy-propionates | Fenoxaprop-p-ethyl | 17.27 | 100   | 362.2  |        | 288.1*                          | 15                               | y = 1E+06x + 15727<br>(0.9966) | 0.24   | 84(14) | 71(1) | 75(3) | 244.2             | 20                         |                    |       |        |        |                                 |                                  |                                |        |        |       |       |                   |                            |                    |       |        |        |                                 |                                  |                                |        |        |       |       |                   |                            |                    |       |        |        |                                 |                                  |                                |        |        |       |       |                   |                            |                    |       |        |        |                                 |                                 |                                |        |        |       |       |                   |                            |                    |       |       |        |        |                                 |                                |        |        |       |       |       |                            |                    |       |       |        |        |                                 |                                |       |        |       |       |       |                   |                            |                    |       |        |       |                                 |                                |                                |        |        |       |       |                   |                            |                    |       |        |       |                                 |                                |                                |        |        |       |       |                   |                            |                    |       |        |       |                                 |                                |                                |        |        |       |       |                   |                            |                    |       |       |       |        |                                |                                |       |        |       |       |       |                            |                    |       |     |       |
| Aryloxyphenoxy-propionates | Fenoxaprop-p-ethyl | 17.27   | 100           | 362.2         | 288.1*      | 15                              | y = 1E+06x + 15727<br>(0.9966)      | 0.24      | 84(14)               | 71(1)      |                            |                    |       |       |        | 75(3)  |                                 |                                  |                                |        |        |       |       |                   |                            |                    |       |        |        |                                 |                                  |                                |        |        |       |       |                   |                            |                    |       |        |        |                                 |                                  |                                |        |        |       |       |                   |                            |                    |       |        |        |                                 |                                  |                                |        |        |       |       |                   |                            |                    |       |        |        |                                 |                                 |                                |        |        |       |       |                   |                            |                    |       |       |        |        |                                 |                                |        |        |       |       |       |                            |                    |       |       |        |        |                                 |                                |       |        |       |       |       |                   |                            |                    |       |        |       |                                 |                                |                                |        |        |       |       |                   |                            |                    |       |        |       |                                 |                                |                                |        |        |       |       |                   |                            |                    |       |        |       |                                 |                                |                                |        |        |       |       |                   |                            |                    |       |       |       |        |                                |                                |       |        |       |       |       |                            |                    |       |     |       |
|                            |                    |         |               |               | 244.2       | 20                              |                                     |           |                      |            |                            |                    |       |       |        |        |                                 |                                  |                                |        |        |       |       |                   |                            |                    |       |        |        |                                 |                                  |                                |        |        |       |       |                   |                            |                    |       |        |        |                                 |                                  |                                |        |        |       |       |                   |                            |                    |       |        |        |                                 |                                  |                                |        |        |       |       |                   |                            |                    |       |        |        |                                 |                                 |                                |        |        |       |       |                   |                            |                    |       |       |        |        |                                 |                                |        |        |       |       |       |                            |                    |       |       |        |        |                                 |                                |       |        |       |       |       |                   |                            |                    |       |        |       |                                 |                                |                                |        |        |       |       |                   |                            |                    |       |        |       |                                 |                                |                                |        |        |       |       |                   |                            |                    |       |        |       |                                 |                                |                                |        |        |       |       |                   |                            |                    |       |       |       |        |                                |                                |       |        |       |       |       |                            |                    |       |     |       |

|                    |                |       |       |        |        |                                    |                                    |        |        |       |       |
|--------------------|----------------|-------|-------|--------|--------|------------------------------------|------------------------------------|--------|--------|-------|-------|
| Azoles             | Difenoconazole | 17.00 | 155   | 406.0  | 251.0* | 25                                 | $y = 4E+06x + 17038$<br>(0.9991)   | 0.06   | 78(6)  | 72(3) | 73(2) |
|                    |                |       |       |        | 337.0  | 15                                 |                                    |        |        |       |       |
|                    | Epoxiconazole  | 16.30 | 120   | 330.1  | 121.1* | 20                                 | $y = 3E+06x - 20987$<br>(0.9997)   | 0.15   | 73(4)  | 73(2) | 75(4) |
|                    |                |       |       |        | 141.1  | 20                                 |                                    |        |        |       |       |
|                    | Hexaconazole   | 16.75 | 120   | 314.1  | 70.1*  | 20                                 | $y = 4E+06x - 25413$<br>(0.9995)   | 0.05   | 73(6)  | 72(3) | 72(2) |
|                    |                |       |       |        | 158.9  | 35                                 |                                    |        |        |       |       |
|                    | Paclobutrazol  | 15.59 | 100   | 294.2  | 70.0*  | 15                                 | $y = 5E+06x - 84165$<br>(0.9963)   | 0.10   | 76(7)  | 71(2) | 73(3) |
| 125.0              |                |       |       |        | 25     |                                    |                                    |        |        |       |       |
| Propiconazole      | 16.68          | 70    | 342.2 | 158.9* | 30     | $y = 432918x - 6197.3$<br>(0.9971) | 0.05                               | 75(12) | 71(3)  | 73(2) |       |
|                    |                |       |       | 69.1   | 20     |                                    |                                    |        |        |       |       |
| Tebuconazole       | 16.61          | 100   | 308.2 | 70.0*  | 25     | $y = 6E+06x - 30812$<br>(0.9997)   | 0.06                               | 73(7)  | 71(3)  | 73(3) |       |
|                    |                |       |       | 125.0  | 25     |                                    |                                    |        |        |       |       |
| Tricyclazole       | 12.40          | 145   | 190.0 | 163.0* | 25     | $y = 2E+06x - 9311.1$<br>(0.9997)  | 0.02                               | 84(7)  | 72(4)  | 74(2) |       |
|                    |                |       |       | 136.0  | 30     |                                    |                                    |        |        |       |       |
| Benzimidazole      | Carbendazim    | 8.52  | 80    | 192.1  | 160.1* | 15                                 | $y = 1E+06x + 9706.3$<br>(0.9987)  | 0.05   | 80(4)  | 72(6) | 73(5) |
|                    |                |       |       |        | 132.1  | 20                                 |                                    |        |        |       |       |
| Thiabendazole      | 9.31           | 145   | 202.1 | 175.1* | 25     | $y = 539088x - 4774.8$<br>(0.9986) | 0.25                               | 82(8)  | 76(6)  | 73(5) |       |
|                    |                |       |       | 131.0  | 30     |                                    |                                    |        |        |       |       |
| Carbamate          | Carbofuran     | 11.42 | 120   | 222.3  | 165.1* | 5                                  | $y = 1E+06x + 684.75$<br>(0.9999)  | 0.25   | 87(16) | 94(4) | 91(4) |
|                    |                |       |       |        | 123.1  | 20                                 |                                    |        |        |       |       |
| Methomyl           | 9.02           | 80    | 163.2 | 88.1*  | 5      | $y = 199924x - 2784.3$<br>(0.9989) | 0.25                               | 79(11) | 84(11) | 85(7) |       |
|                    |                |       |       | 106.1  | 10     |                                    |                                    |        |        |       |       |
| Pirimicarb         | 10.85          | 120   | 239.2 | 72.0*  | 20     | $y = 3E+06x - 39216$<br>(0.9982)   | 0.50                               | 90(9)  | 73(8)  | 75(3) |       |
|                    |                |       |       | 182.2  | 15     |                                    |                                    |        |        |       |       |
| Neonicotinoids     | Acetamiprid    | 11.43 | 120   | 223.2  | 126.0* | 15                                 | $y = 336940x - 199.36$<br>(0.9998) | 0.25   | 99(4)  | 82(9) | 80(5) |
|                    |                |       |       |        | 56.0   | 15                                 |                                    |        |        |       |       |
| Clothianidin       | 10.86          | 80    | 250.2 | 169.1* | 10     | $y = 94329x - 549.9$<br>(0.9999)   | 1.00                               | 89(10) | 84(8)  | 84(5) |       |
|                    |                |       |       | 132.0  | 15     |                                    |                                    |        |        |       |       |
| Imidacloprid       | 10.70          | 80    | 256.1 | 175.1* | 10     | $y = 158852x + 56816$<br>(0.9929)  | 0.06                               | 87(6)  | 92(4)  | 87(4) |       |
|                    |                |       |       | 209.1  | 10     |                                    |                                    |        |        |       |       |
| Thiamethoxam       | 9.18           | 80    | 292.1 | 211.2* | 10     | $y = 110844x - 2060$<br>(0.9959)   | 0.79                               | 73(15) | 91(7)  | 81(6) |       |
|                    |                |       |       | 181.1  | 20     |                                    |                                    |        |        |       |       |
| Organochlorine/org | Bentazone      | 17.46 | 80    | 240.3  | 162.1* | 10                                 | $y = 284608x - 316.07$             | 0.91   | 83(7)  | 74(3) | 73(3) |

|                  |                      |       |     |       |        |    |                        |      |        |        |       |
|------------------|----------------------|-------|-----|-------|--------|----|------------------------|------|--------|--------|-------|
| anophosphate     | Chlorpyrifos         | 17.62 | 100 | 350.0 | 147.1  | 20 | (0.9999)               | 1.00 | 78(13) | 78(5)  | 71(4) |
|                  |                      |       |     |       | 198.0* | 20 | $y = 136901x - 914.24$ |      |        |        |       |
|                  | Pyridaben            | 18.15 | 100 | 365.1 | 79.0   | 35 | (0.9996)               | 0.07 | 83(9)  | 74(3)  | 73(2) |
|                  |                      |       |     |       | 147.1* | 20 | $y = 5E+06x - 23464$   |      |        |        |       |
|                  | Spirodiclofen        | 17.89 | 70  | 411.1 | 309.1  | 20 | (0.9998)               | 0.01 | 78(10) | 72(6)  | 73(2) |
|                  |                      |       |     |       | 313.1* | 5  | $y = 555772x - 3350.4$ |      |        |        |       |
| Oxazinone        | Oxaziclomefone       | 17.24 | 80  | 376.1 | 295.1  | 25 | (0.9998)               | 0.08 | 74(9)  | 74(2)  | 75(2) |
|                  |                      |       |     |       | 190.1* | 10 | $y = 3E+06x + 21565$   |      |        |        |       |
| Strobilurin      | Azoxystrobin         | 15.18 | 120 | 404.0 | 161.1  | 25 | (0.9964)               | 0.27 | 75(10) | 72(4)  | 75(5) |
|                  |                      |       |     |       | 372.0* | 10 | $y = 2E+06x - 10668$   |      |        |        |       |
|                  | Kresoxim-methyl      | 16.54 | 100 | 314.0 | 344.1  | 15 | (0.9999)               | 1.00 | 91(14) | 72(7)  | 77(3) |
|                  |                      |       |     |       | 222.1* | 8  | $y = 152585x + 1327.6$ |      |        |        |       |
|                  | Picoxystrobin        | 16.45 | 80  | 368.1 | 193.9  | 30 | (0.9987)               | 0.06 | 77(10) | 72(2)  | 76(4) |
|                  |                      |       |     |       | 145.0* | 12 | $y = 4E+06x - 5539.2$  |      |        |        |       |
|                  | Pyraclostrobin       | 16.83 | 90  | 387.8 | 205.0  | 4  | (0.9999)               | 0.05 | 80(8)  | 73(5)  | 75(3) |
|                  |                      |       |     |       | 163.1* | 20 | $y = 1E+06x + 3925.2$  |      |        |        |       |
| Substituted urea | Isoproturon          | 14.38 | 120 | 207.2 | 149.0  | 30 | (0.9994)               | 0.11 | 93(13) | 76(2)  | 82(3) |
|                  |                      |       |     |       | 72.0*  | 15 | $y = 4E+06x - 14461$   |      |        |        |       |
| Sulfonylurea     | Halosulfuron-methyl  | 16.43 | 120 | 434.8 | 165.1  | 15 | (0.9999)               | 0.12 | 82(15) | 81(7)  | 79(2) |
|                  |                      |       |     |       | 181.9* | 15 | $y = 432918x - 6197.3$ |      |        |        |       |
|                  | Nicosulfuron         | 13.40 | 120 | 411.0 | 402.7  | 4  | (0.9971)               | 0.05 | 9(17)  | 11(16) | 12(4) |
|                  |                      |       |     |       | 182.0* | 19 | $y = 689475x - 6246.3$ |      |        |        |       |
|                  | Pyrazosulfuron-ethyl | 16.21 | 102 | 415.0 | 213.0  | 19 | (0.9987)               | 0.02 | 73(10) | 75(6)  | 73(3) |
|                  |                      |       |     |       | 182.0* | 15 | $y = 1E+06x - 23215$   |      |        |        |       |
| Thiadiazine      | Buprofezin           | 17.16 | 120 | 306.2 | 139.0  | 15 | (0.9942)               | 0.04 | 77(8)  | 71(2)  | 73(3) |
|                  |                      |       |     |       | 116.0* | 10 | $y = 7E+06x + 47942$   |      |        |        |       |
| Triazine         | Atrazine             | 14.29 | 120 | 216.0 | 201.0  | 15 | (0.9988)               | 0.11 | 73(9)  | 74(5)  | 79(2) |
|                  |                      |       |     |       | 174.2* | 15 | $y = 5E+06x - 67935$   |      |        |        |       |
|                  | Prometryn            | 14.21 | 120 | 242.2 | 132.0  | 20 | (0.9974)               | 0.24 | 76(11) | 72(2)  | 75(3) |
|                  |                      |       |     |       | 158.1* | 20 | $y = 1E+07x - 159257$  |      |        |        |       |
| Triazinone       | Pymetrozine          | 1.08  | 100 | 218.1 | 200.1  | 20 | (0.9980)               | 0.75 | 50(10) | 39(13) | 45(9) |
|                  |                      |       |     |       | 105.1* | 20 | $y = 277164x + 442.31$ |      |        |        |       |
|                  |                      |       |     |       | 78.0   | 40 | (0.9992)               |      |        |        |       |

|               |               |       |     |       |        |    |                       |      |        |        |       |
|---------------|---------------|-------|-----|-------|--------|----|-----------------------|------|--------|--------|-------|
| Triazolinones | Sulfentrazone | 13.61 | 130 | 387.1 | 307.1* | 20 | $y = 52960x - 678.81$ | 1.00 | 92(10) | 86(11) | 77(7) |
|               |               |       |     |       | 273.0  | 30 | (0.9970)              |      |        |        |       |

Note: The product ion “\*” indicates that it is the quantification ion, and the other is the confirmatory ion.

**Table S4.** HPLC-MS/MS parameters and validation results (calibration curves, R<sup>2</sup>, LOD, recoveries and RSD) of 10 antibiotics

| Category        | Compounds         | RT (min) | Fragmentor(V) | Precursor ion | Product ion | Collision energy (V)               | Calibration curve (R <sup>2</sup> ) | LOD µg/kg | Recovery, %( RSD, %) |            |           |           |
|-----------------|-------------------|----------|---------------|---------------|-------------|------------------------------------|-------------------------------------|-----------|----------------------|------------|-----------|-----------|
|                 |                   |          |               |               |             |                                    |                                     |           | 0.01 mg/kg           | 0.05 mg/kg | 0.1 mg/kg | 0.5 mg/kg |
| Tetracyclines   | Chlortetracycline | 10.1     | 115           | 479.2         | 260.2*      | 60                                 | $y = 42420x - 5.1174$<br>(0.9989)   | 1.20      | 75(11)               | 89(8)      | 73(3)     | 76(3)     |
|                 |                   |          |               |               | 303.2       | 40                                 |                                     |           |                      |            |           |           |
|                 | Doxycycline       | 10.6     | 120           | 445.2         | 286.2       | 60                                 | $y = 54499x + 96.08$<br>(0.9994)    | 1.00      | 86(8)                | 89(10)     | 70(4)     | 71(2)     |
|                 |                   |          |               |               | 201.0*      | 45                                 |                                     |           |                      |            |           |           |
| Oxytetracycline | 8.9               | 120      | 461.2         | 252.2         | 50          | $y = 70010x + 119.87$<br>(0.9997)  | 1.00                                | 94(15)    | 96(10)               | 87(17)     | 72(10)    |           |
|                 |                   |          |               | 201.1*        | 40          |                                    |                                     |           |                      |            |           |           |
| Tetracycline    | 8.8               | 120      | 445.2         | 283.1         | 45          | $y = 147737x + 152.82$<br>(0.9996) | 0.75                                | 78(6)     | 99(10)               | 73(4)      | 73(3)     |           |
|                 |                   |          |               | 268.3         | 55          |                                    |                                     |           |                      |            |           |           |
| Macrolids       | Erythromycin      | 11.1     | 130           | 734.5         | 154.2*      | 25                                 | $y = 493369x - 936.01$<br>(0.9993)  | 0.04      | 39(6)                | 51(9)      | 49(6)     | 53(5)     |
|                 |                   |          |               |               | 158.1*      | 30                                 |                                     |           |                      |            |           |           |
|                 | Roxithromycin     | 11.5     | 135           | 837.6         | 116         | 50                                 | $y = 662896x + 1170.9$<br>(0.9998)  | 0.01      | 38(13)               | 40(4)      | 37(7)     | 42(7)     |
|                 |                   |          |               |               | 158.1*      | 35                                 |                                     |           |                      |            |           |           |
| Sulfonamides    | Sulfadimethoxine  | 10.6     | 110           | 311.2         | 156.2*      | 20                                 | $y = 717419x + 1232.1$<br>(0.9997)  | 0.10      | 91(2)                | 92(3)      | 94(2)     | 82(2)     |
|                 |                   |          |               |               | 108.1       | 30                                 |                                     |           |                      |            |           |           |
|                 | Sulfamerazine     | 6.9      | 110           | 265.2         | 173.1       | 30                                 | $y = 230172x + 14.465$<br>(0.9993)  | 1.15      | 108(3)               | 85(5)      | 76(5)     | 81(2)     |
|                 |                   |          |               |               | 108.1*      | 25                                 |                                     |           |                      |            |           |           |
| Sulfameter      | 8.4               | 110      | 281.2         | 172           | 10          | $y = 137677x - 62.506$             | 2.00                                | 77(5)     | 71(3)                | 77(6)      | 77(4)     |           |
|                 |                   |          |               | 156           | 10          |                                    |                                     |           |                      |            |           |           |
|                 |                   |          |               | 108.2*        | 25          |                                    |                                     |           |                      |            |           |           |

|                  |     |     |       |        |    |                        |      |        |       |       |       |
|------------------|-----|-----|-------|--------|----|------------------------|------|--------|-------|-------|-------|
|                  |     |     |       | 126.2  | 25 | (0.9996)               |      |        |       |       |       |
|                  |     |     |       | 108.1* | 20 |                        |      |        |       |       |       |
| Sulfamethoxazole | 9.4 | 100 | 254.2 | 146.1  | 15 | $y = 234875x + 229.41$ | 0.57 | 84(11) | 87(4) | 84(3) | 80(1) |
|                  |     |     |       | 160.3  | 15 | (0.9997)               |      |        |       |       |       |

Note: "\*" indicates the quantification ion.

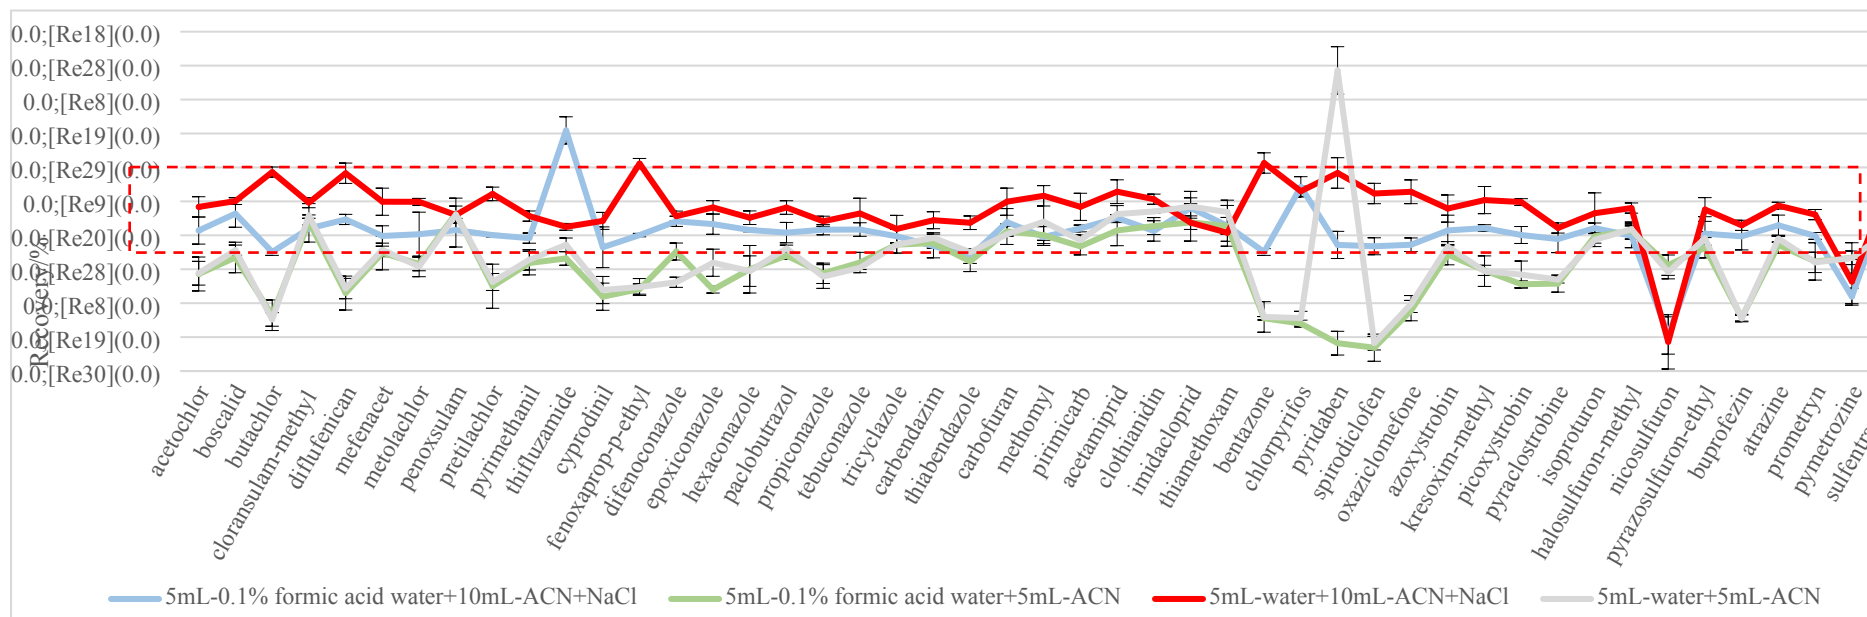

**Figure S1.** Recoveries of pesticides with different extraction conditions. "5ml-0.1% formic acid water+10ml-ACN+NaCl" is 10.0 g of soil sample with 5 mL 0.1% formic acid water, 10 mL acetonitrile, and 3 g NaCl.

It can be seen from the figure S1 that the recovery was improved with NaCl as salting out under the same conditions, and the recovery was improved with water extraction under the same conditions.

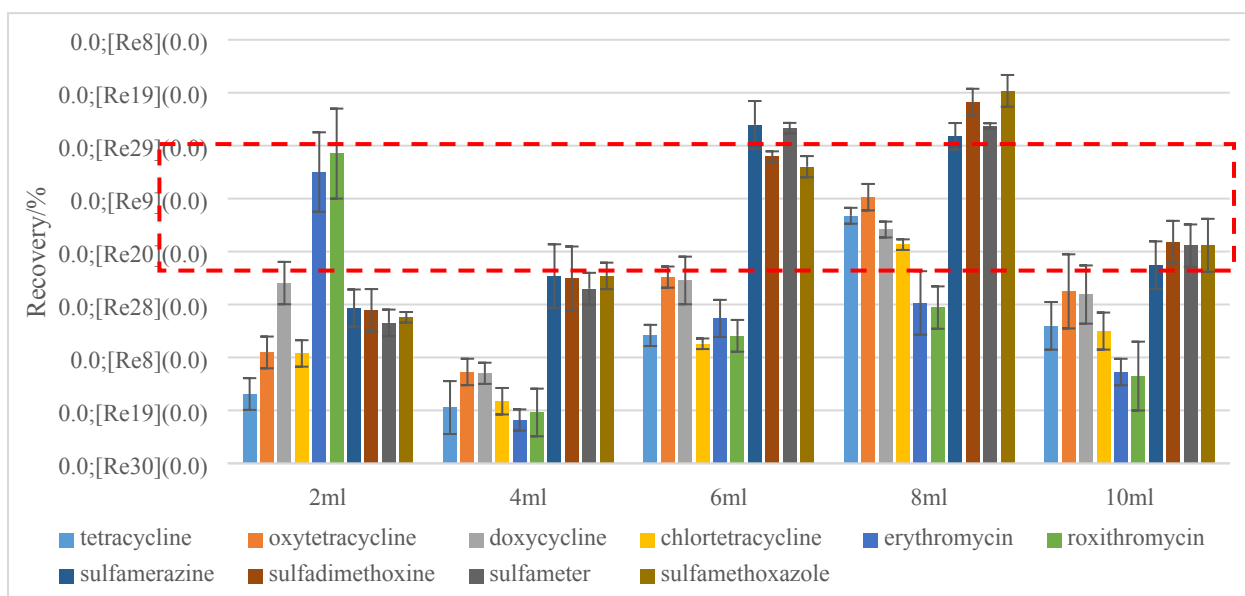

**Figure S2.** Recoveries of antibiotics with different extraction solvent volume (extraction time was 30 min)

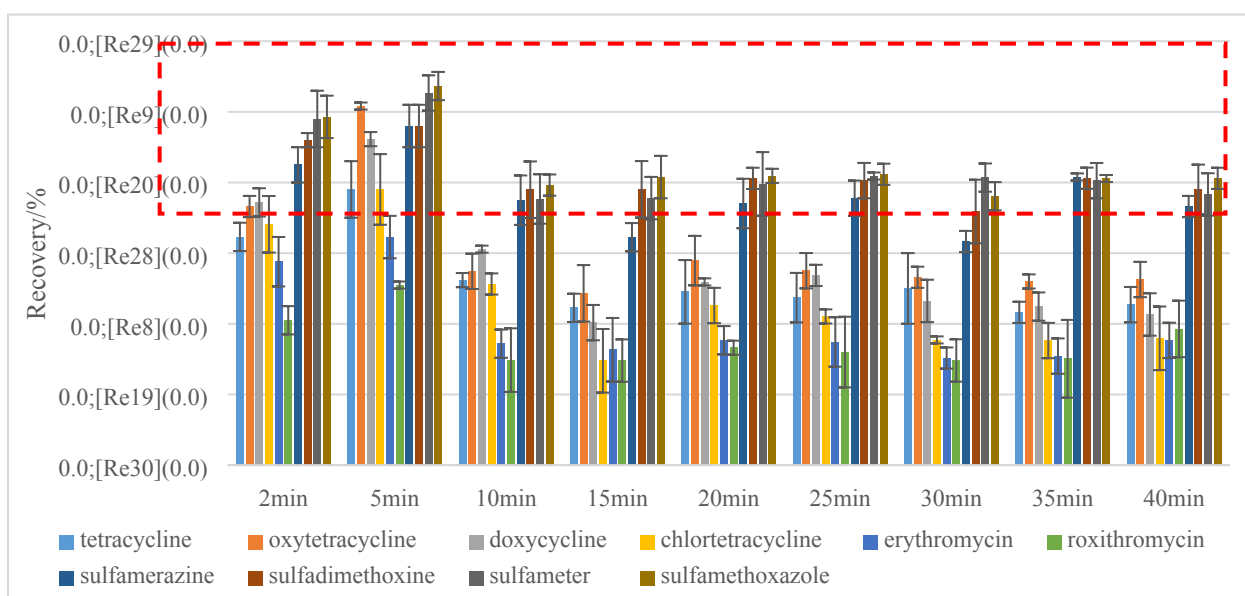

**Figure S3.** Recoveries of antibiotics with different extraction time (extraction solvent volume was 8mL)

Figures S4-6 were results of the purification effects of PAX that explored at different dosages and in different roles. First, different PAX dosages were evaluated. 1 mL of 0.5 mg/L methanol/EDTA-McIlvaine (v/v=1/1) standard solution was added to 25, 50, 80, 100, and 150 mg PAX respectively. Each sample was vortexed for 30 seconds, then 1 mL of supernatant was filtered through a 0.22  $\mu\text{m}$  organic filter membrane after centrifugation (10000 rpm) for 1 min. Considering that PAX cannot only absorb impurities as a cleaner, but also adsorb the target compounds as an adsorbent. Therefore 80 mg of PAX was selected to optimize



eluent in the next step. 1 mL of 0.5 mg/L methanol/EDTA-McIlvaine (v/v=1/1) standard solution was placed into a 2 mL centrifuge tube with 80 mg PAX, vortexed, centrifuged, and 1 mL of supernatant was filtered through a 0.22  $\mu$ m filter membrane. The 1 mL of supernatant was "up-without-eluted". The PAX adsorbent layer was eluted with different volume ratios of 1 mL methanol/water, vortexed, and after centrifugation the supernatant was filtered through the filter membrane for analysis. These supernatants were "down-'solvent'". The results showed that the recoveries of the 10 antibiotics were still low (Fig. S5). An experiment was then conducted to optimize the solvent for activation. 80 mg PAX was weighed and activated with 1 mL of methanol, water, methanol/water (v/v=6/4), water after methanol, and methanol after water, respectively, then each sample was vortexed, centrifuged at 10000 rpm, and the supernatant was discarded. 1 mL 0.5 mg/L methanol/EDTA-McIlvaine (v/v=1/1) standard solution was then added, and each sample was vortexed, centrifuged, and the supernatant from each sample was filtered through a 0.22  $\mu$ m filter membrane. The supernatant of un-activated PAX sample and no clean-up sample were also made for comparison. The results showed that the recovery of activated solvent with methanol performed best, but the four sulfonamide antibiotics had low recovery (Fig. S6). Only two macrolides display a lower recovery rate without cleaning-up, while four sulfonamides have a lower recovery rate with methanol-activated cleaning. Furthermore, skipping the cleaning-up step was relatively quick, convenient, and economical. Therefore, the decision was taken not to go through the cleaning-up process.

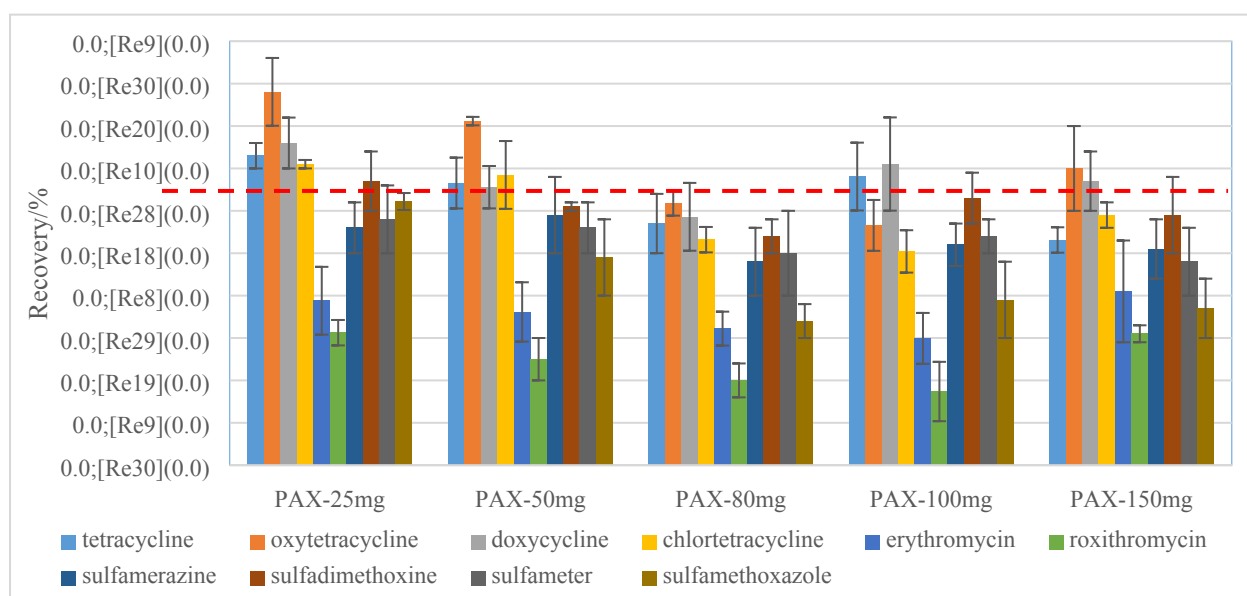

**Figure S4.** Recoveries of antibiotics with different amount of PAX

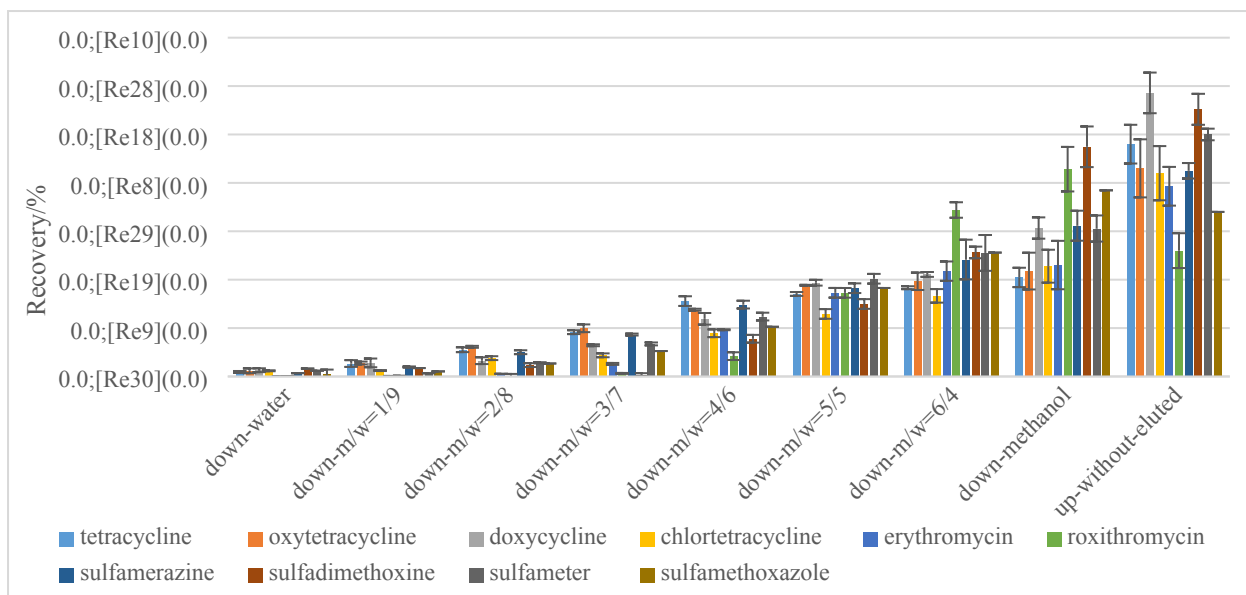

**Figure S5.** Comparison of recoveries of supernatant sample and different eluent

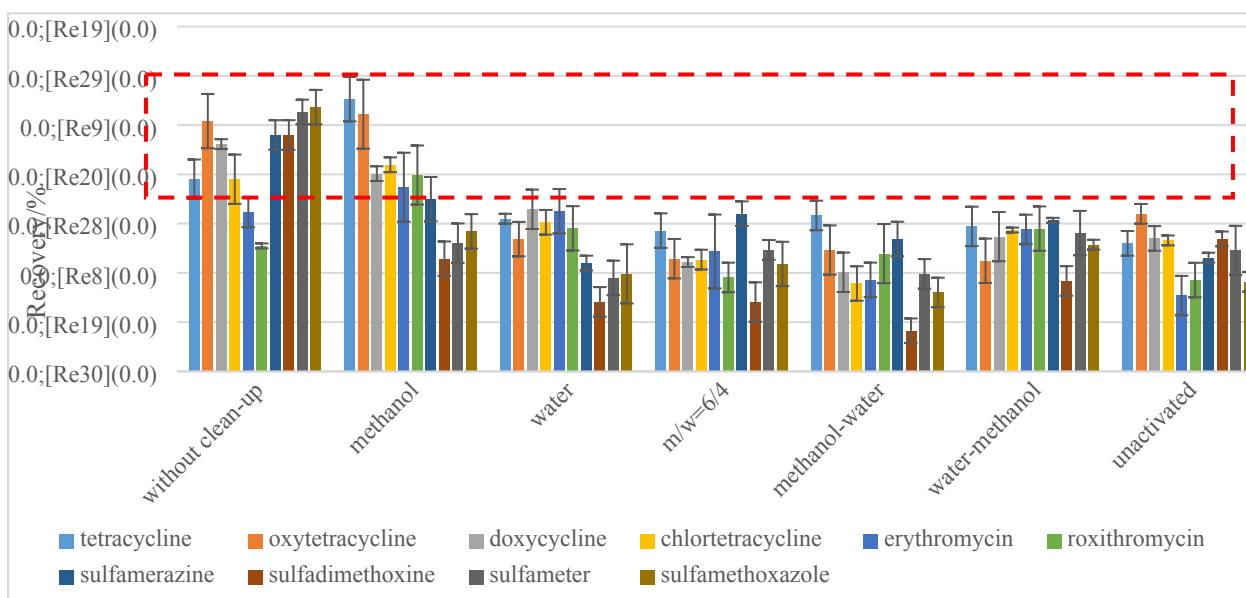

**Figure S6.** Comparison of recoveries of antibiotics with different solvent activation and no clean-up
